# Supplementary material
Source: publisher site journal article supplement (https://www.spandidos-publications.com/2306/downloadSupplementary)
Supplement: Supplementary file 1 [file downloadSupplementary]

## Sheet: Supplementary table II
Τable SII. siRNA targets or catalog numbers.
ABACL 1	GAAGGAAGATTGTAACATA
ABACL 2	CCTCTTCCGTGATGATAAA
CXof38 1	CAGAGATTGTGGCAGTATA
CXof38 2	CTTCGAGATTTTCAGATGA
LIPT1 1	GGAATATTCTCTGTGAAAA
LIPT1 2	GAAGCACCTGATCATTGGT
MITD1 1	GTTCAATACTCTTCTTCAA
MITD1 2	GAGTCACTTTTTCGCGAAT
MITD1 3	GACAGAGCGGAAAACATAA
ZNF524 1	GCCCTATACGGTCTCTGAA
ZNF524 2	GAAACCTCTGGCCTTATCT
TRIM38 1	GTGCAATGTTTCCAAGCTT
TRIM38 2	GGGCTCCATTTCATATGGA
EHBP1 1	GATCCAGAATCTCCTATCA
EHBP1 2	GGCTGACATTGGCAATTTA
NC(negative control si-RNA )	siN0000002-1-5
